# Supplementary material for: Staphylococcus aureus autoinducer-2 quorum sensing decreases biofilm formation in an icaR-dependent manner
Source: PubMed Central journal article supplement (PMC3539994; doi:10.1186/1471-2180-12-288), 2012-12-05

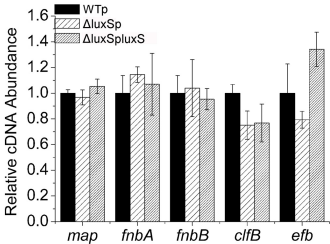

Supplement: 1471-2180-12-288-S1.pdf [file 1471-2180-12-288-S1.pdf]
