# Supplementary material for: Staphylococcus aureus autoinducer-2 quorum sensing decreases biofilm formation in an icaR-dependent manner
Source: PubMed Central journal article supplement (PMC3539994; doi:10.1186/1471-2180-12-288), 2012-12-05
Supplement: 1471-2180-12-288-S2.pdf [file 1471-2180-12-288-S2.pdf]

WTp  $\Delta$ luxSp  $\Delta$ luxSpluxS

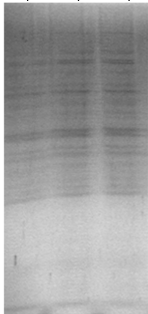

4h

WTp  $\Delta$ luxSp  $\Delta$ luxSpluxS

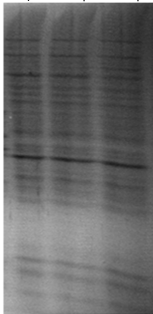

24h
